# Supplementary material
Source: PubMed Central journal article supplement (PMC3019660)
Supplement: supp_55_1_211__1.pdf [file supp_55_1_211__1.pdf]

Mahanty *et al.*  
Supplementary Figure 1

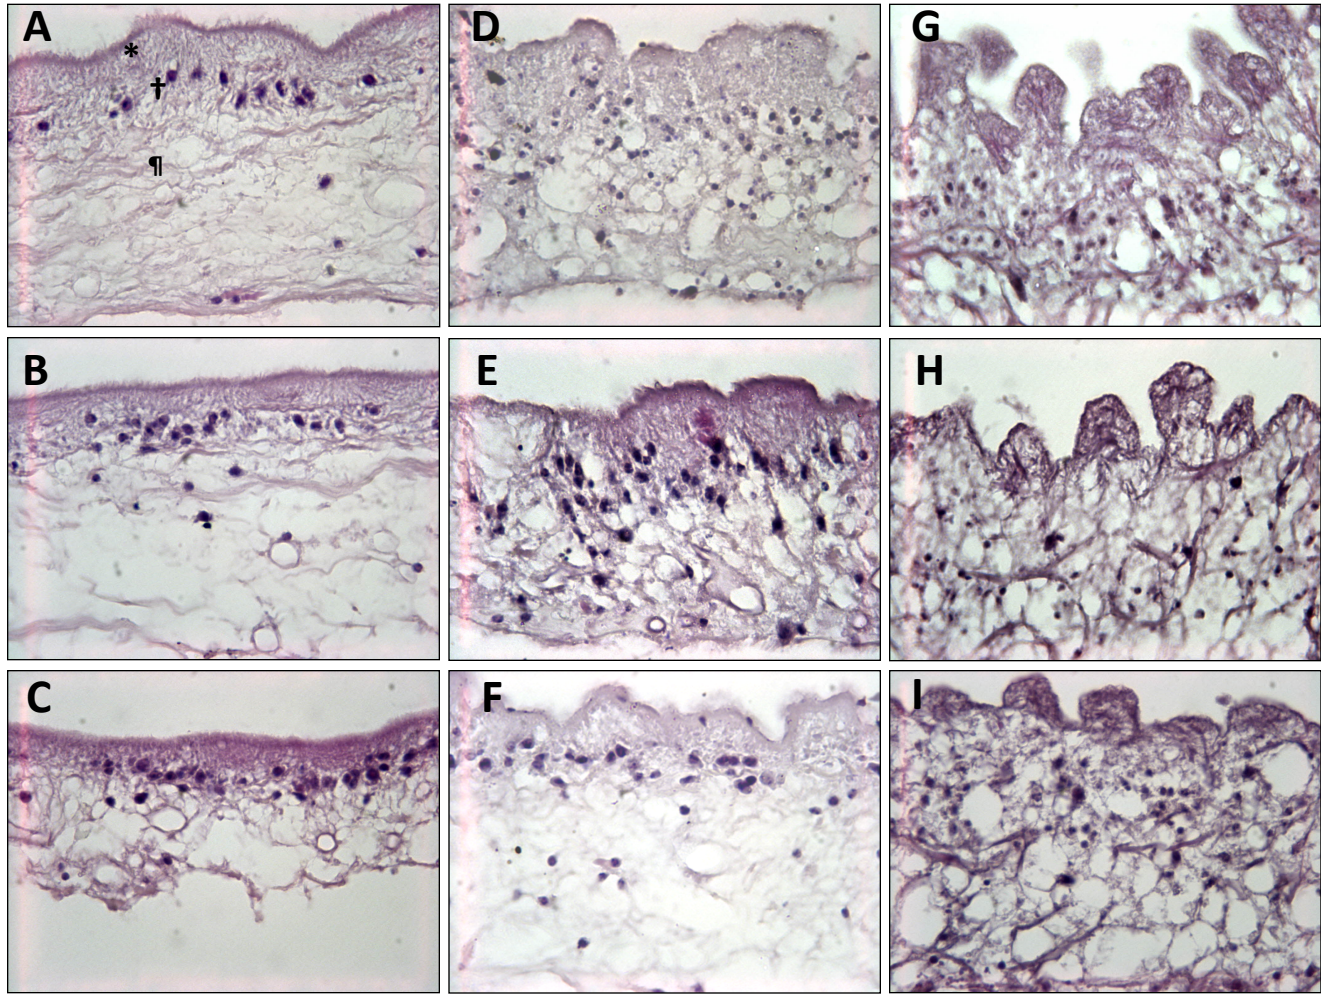

## Legend for Supplementary Figure 1

**Supplementary Figure 1.** Histopathological changes in the tegument and sub-tegumentary areas of cysts treated with PZQ and ABZ in vitro. Haematoxylin-eosin stains of single *Ts* cysts at the start of in vitro culture in RPMI medium (A; see Methods for details of culture conditions), RPMI medium with 0.00005% DMSO (B) or 0.00025% ethanol (C). Cysts that had been incubated for 3 days with RPMI medium alone (D), with DMSO (E; 0.00005%), ethanol (F; 0.00025%), ABZ (G; 75 ng/ml), PZQ (H; 5 ng/ml) or ABZ 75 ng/ml and PZQ 5 ng/ml (I). All images are shown at 1000X magnification. Symbol key (shown in A, but applicable to corresponding regions in all images) refer to the tegument (\*), sub-tegumentary region (†) and the internal regions (¶) of the cyst wall. Culture for 3 days in medium with DMSO (E) and ethanol (F) show minimal, but perceptible changes in the tegument and sub-tegumentary regions with slight loss of integrity of the surface structures, but treatment with PZQ or ABZ-SO or a combination at the same time point show significantly more disorganization of the tegument and damage, with loss of tissue organization in the tegument, sub-tegumentary and internal regions (G, H and I).
